# Supplementary material for: Short-Term Soy Bread Intervention Leads to a Dose-Response Increase in Urinary Isoflavone Metabolites and Satiety in Chronic Pancreatitis
Source: MDPI journal article supplement (doi:10.3390/foods12091762), 2023-04-24
Supplement: s1 [file s1]

## Supplementary Results Figure S1

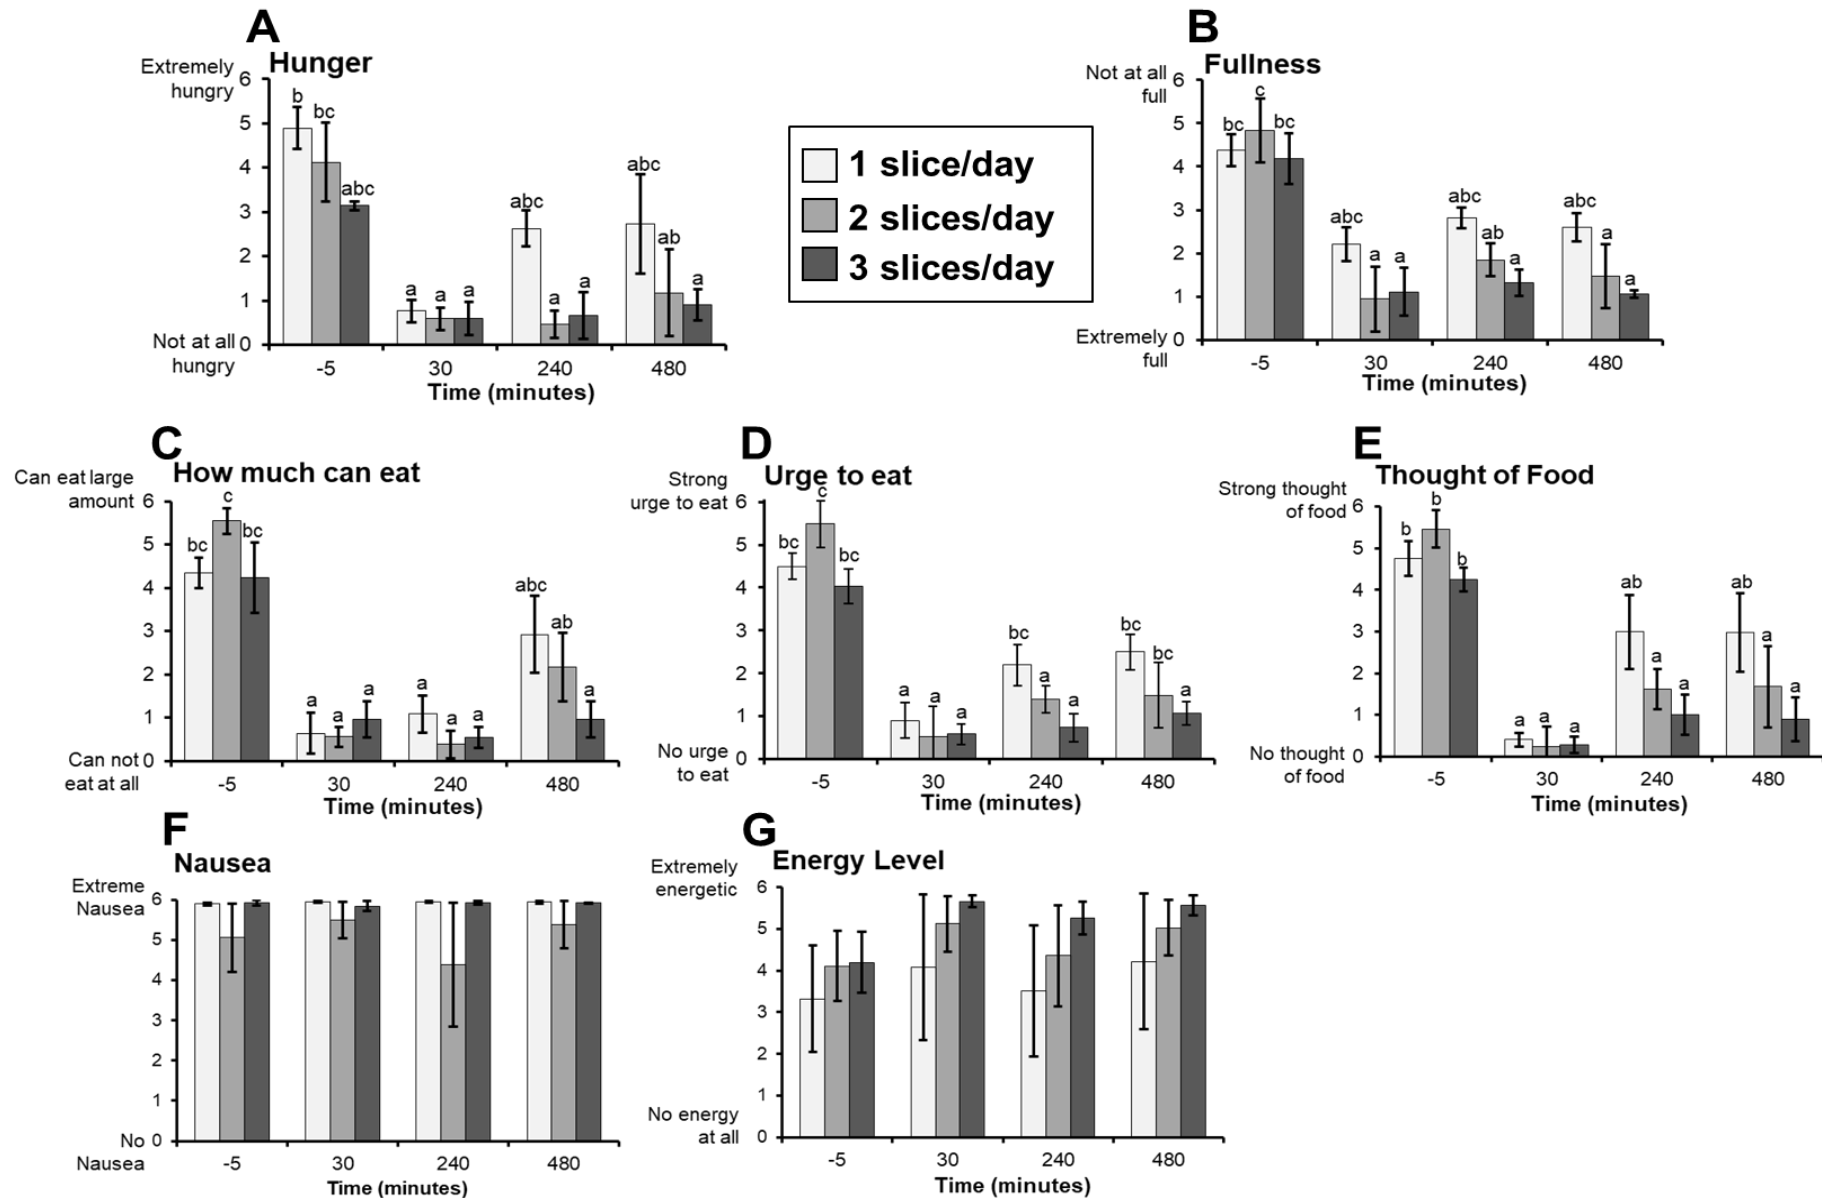

**Figure S1.** VAS scores were used to assess soy bread satiety. A to G, VAS scores were used to assess satiety over 8 hours and across three doses. Satiety was represented as bar graphs (mean  $\pm$  SD). Superscript letters represent the mean separation using one way ANOVA analysis and Tukey's post hoc test when significant differences ( $p \leq 0.05$ ) were observed. \*Significant differences ( $p \leq 0.05$ ) between soy bread and ideal bread using a paired t-test.
